# Supplementary material
Source: PubMed Central journal article supplement (PMC7856034)
Supplement: NIHMS1642455-supplement-Appendix_S1.pdf [file NIHMS1642455-supplement-Appendix_S1.pdf]

## Appendix S1

| Study # | Year | Indication                                         | Location   | CNV      | Size (kb)/% | Inheritance           | Gene/Disease                                                                                                                                                                                       | Category                   | Outcome                                                       | Phenotype well known | Data available regarding likelihood of an affected fetus |
|---------|------|----------------------------------------------------|------------|----------|-------------|-----------------------|----------------------------------------------------------------------------------------------------------------------------------------------------------------------------------------------------|----------------------------|---------------------------------------------------------------|----------------------|----------------------------------------------------------|
| 1       | 2018 | Prior pregnancies Trisomy 21 and Trisomy 16        | 15q12q13.1 | Loss     | 90          | unknown               | Partial loss of <i>OCA2</i> , associated with oculocutaneous albinism type 2 (AR)                                                                                                                  | Likely carrier             | Full term, healthy                                            | Yes                  | Yes                                                      |
| 2       | 2018 | Mom with retinitis pigmentosa; NT 3.3              | 17p11.2    | Gain     | 21          | unknown               | Partial gain of <i>FLCN</i> , associated with Birt-Hogg-Dube syndrome with losses; 1 case report of a full copy gain                                                                               | CNV with OMIM Morbid Genes | Preterm, induction for chorioamnionitis                       | Yes                  | No                                                       |
| 3       | 2018 | Uncle spina bifida; NT 3.6                         | 12q12      | Gain     | 1450        | paternal              | Gain of <i>IRAK4</i> , <i>ADAMTS20</i> , <i>TWF1</i> , <i>NELL2</i> . Diseases only associated with loss                                                                                           | CNV with OMIM Morbid Genes | Full term, healthy                                            | Yes                  | Yes                                                      |
| 4       | 2018 | Prior pregnancy skeletal dysplasia; AMA            | 7p21.2     | Loss x 2 | 50          | maternal and paternal | Loss in intron of <i>ISPD</i> , associated with Walker-Warburg syndrome. Loss only described in exon deletions.                                                                                    | CNV with OMIM Morbid Genes | Full term, healthy                                            | Yes                  | Yes                                                      |
| 5       | 2017 | Complex cardiac defect; Parents are 1st cousins    | [ROH]      | ROH      | 17.50%      | [ROH]                 | 58 genes identified associated with cardiac defects                                                                                                                                                | Large ROH                  | NND, 7 wks. Mildly dysmorphic. WES neg.                       | No                   | Yes                                                      |
| 6       | 2017 | AMA; CVS mosaic Trisomy 18                         | Xp22.31    | Loss     | 1694        | unknown               | Female with loss of 8 genes, including <i>STS</i> , associated with X-linked ichthyosis. Females may have minor skin manifestations or corneal opacities; UPD18 confirmed (not an imprinted gene)  | Likely carrier             | Full term, unknown health status                              | Yes                  | Yes                                                      |
| 7       | 2017 | Niece with hand with 1 finger; known consanguinity | [ROH]      | ROH      | 5.30%       | [ROH]                 | 110 genes, but none likely to be related to the family history                                                                                                                                     | Large ROH                  | Preterm delivery; sacral dimple, mild conductive hearing loss | No                   | Yes                                                      |
| 8       | 2017 | AMA; Family h/o epilepsy                           | 16p13.3    | Loss     | 50          | maternal              | Loss of promoter and a non-protein coding exon of transcript variants of <i>RBFOX1</i> , associated with epilepsy and autism spectrum disorder with losses of protein-coding exons                 | CNV with OMIM Morbid Genes | Full term, healthy                                            | Yes                  | Yes                                                      |
| 9       | 2017 | AMA; 2 sons with autism                            | 16p13.11   | Gain     | 1555        | unknown               | Gain in <i>NDE1</i> and <i>MYH11</i> , associated with 16p13.11 Microduplication Syndrome with incomplete penetrance and variable expressivity. Same CNV as an affected brother (other not tested) | Incomplete penetrance      | Termination                                                   | Yes                  | Yes                                                      |
| 10      | 2017 | AMA; Family history of developmental delay         | 8p22       | Gain x 2 | 1288        | maternal              | Gain x 2 in <i>DLC1</i> associated with cancer if deleted                                                                                                                                          | CNV with OMIM Morbid Genes | Full term, healthy                                            | Yes                  | Yes                                                      |

| Study # | Year | Indication                                                                  | Location    | CNV  | Size (kb)/% | Inheritance | Gene/Disease                                                                                                                                                                                                                                | Category                   | Outcome                                                                                                                                          | Phenotype well known | Data available regarding likelihood of an affected fetus |
|---------|------|-----------------------------------------------------------------------------|-------------|------|-------------|-------------|---------------------------------------------------------------------------------------------------------------------------------------------------------------------------------------------------------------------------------------------|----------------------------|--------------------------------------------------------------------------------------------------------------------------------------------------|----------------------|----------------------------------------------------------|
| 11      | 2018 | Abnormal analytes                                                           | 2q13        | Gain | 1703        | paternal    | 7 genes associated with autism spectrum disorder, developmental disorder, but with incomplete penetrance.                                                                                                                                   | Incomplete penetrance      | Full term, healthy                                                                                                                               | Yes                  | Yes                                                      |
| 12      | 2014 | AMA; club foot, enlarged NT, oligohydramnios; paternal uncle with club foot | 2p21        | Gain | 378         | de novo     | Gain in <i>DYNC2LI1</i> , <i>ABCG5</i> , <i>ABCG8</i> and <i>LRPPRC</i> . No reports of abnormal phenotype with copy gains.                                                                                                                 | CNV with OMIM Morbid Genes | Delivered at 36 weeks, unknown outcome                                                                                                           | Yes                  | Yes                                                      |
| 13      | 2014 | AMA                                                                         | 3p26.2p26.1 | Loss | 265         | unknown     | Deletion of single exon of <i>SUMG1</i> gene, associated with multiple sulfatase deficiency (AR)                                                                                                                                            | Likely carrier             | Both parents sequenced, did not have mutation of this gene. Full term birth, healthy.                                                            | Yes                  | Yes                                                      |
| 14      | 2014 | AMA                                                                         | 16p12.2     | Gain | 604         | paternal    | Gain in <i>UQRC2</i> ; losses associated with mitochondrial complex III deficiency nuclear type 5                                                                                                                                           | CNV with OMIM Morbid Genes | Full term birth, healthy                                                                                                                         | Yes                  | Yes                                                      |
| 15      | 2015 | AMA, prior fetus with Trisomy 21, RPL                                       | 16p13.11    | Loss | 407         | paternal    | Loss in <i>ABCC6</i> and <i>MYH11</i> , associated with vascular and connective tissue disorders in loss of function mutations. Overlaps with 16p13.11 microdeletion syndrome, but does not involve the strongest causative candidate gene. | CNV with OMIM Morbid Genes | Full term birth; healthy                                                                                                                         | Yes                  | No                                                       |
| 16      | 2015 | Abnormal analytes; unilateral cleft lip/palate                              | 2p25.3      | Gain | 838         | paternal    | Gain in <i>TPO</i> ; loss of function mutations associated with thyroid dysmorphogenesis 2A.                                                                                                                                                | CNV with OMIM Morbid Genes | Full term birth; cleft lip/palate; SGA; developmental delay; ALL; seizures. Panel of 500 cancer genes showed no pathogenic germline alterations. | Yes                  | Yes                                                      |
| 17      | 2015 | AMA; abnormal analytes                                                      | 2q11.1q11.2 | Gain | 1446        | unknown     | Gain of <i>TMEM127</i> , <i>CNNM4</i> , <i>SNRNP200</i> , <i>SEMA4C</i> and 34 other genes. Only loss of function variants associated with disease                                                                                          | CNV with OMIM Morbid Genes | Full term birth; SGA, speech delay                                                                                                               | Yes                  | Yes                                                      |
| 18      | 2015 | AMA                                                                         | 8p23.2      | Gain | 1110        | maternal    | Gain of <i>CSMD1</i> , associated with developmental delay and autistic features in single nucleotide variants                                                                                                                              | CNV with OMIM Morbid Genes | Full term birth; healthy                                                                                                                         | Yes                  | Yes                                                      |

| Study # | Year | Indication                                                         | Location       | CNV      | Size (kb)/% | Inheritance | Gene/Disease                                                                                                                                                                         | Category                   | Outcome                                                                                                            | Phenotype well known | Data available regarding likelihood of an affected fetus |
|---------|------|--------------------------------------------------------------------|----------------|----------|-------------|-------------|--------------------------------------------------------------------------------------------------------------------------------------------------------------------------------------|----------------------------|--------------------------------------------------------------------------------------------------------------------|----------------------|----------------------------------------------------------|
|         |      |                                                                    | 16p13.3        | Loss     | 17          | maternal    | Loss of <i>HBA1</i> and <i>HBA2</i> , associated with alpha thalassemia. Mother known alpha thalassemia trait, father with normal MCV and hemoglobin electrophoresis.                | Likely carrier             |                                                                                                                    | Yes                  | Yes                                                      |
| 19      | 2015 | Renal pelviectasis, echogenic bowel                                | 16p13.3        | Loss     | 17          | unknown     | <i>HBA1</i> and <i>HBA2</i> , likely alpha thalassemia trait                                                                                                                         | Likely carrier             | Full term birth; unknown postnatal findings                                                                        | Yes                  | Yes                                                      |
| 20      | 2015 | NIPT high risk for Angelman syndrome                               | 15q11.2        | Loss     | 26          | maternal    | Loss within intron 1 of <i>SNRPN</i> , associated with Angelman syndrome, but downstream of imprinting center. Rare deletions in healthy controls                                    | CNV with OMIM Morbid Genes | Full term birth; unknown postnatal findings                                                                        | Yes                  | Yes                                                      |
| 21      | 2015 | Bilateral club feet                                                | 22q11.21       | Loss     | 730         | unknown     | LCR B to D deletion in 22q11.21; does not include <i>TBX1</i> , thought to be responsible for DiGeorge syndrome. Does contain <i>CRKL</i> , sometimes involved in cardiac anomalies. | Incomplete penetrance      | Elective termination                                                                                               | Yes                  | Yes                                                      |
| 22      | 2015 | AMA                                                                | 7q36.2         | Loss     | 175         | maternal    | Loss of <i>DPP6</i> , associated with autosomal dominant mental retardation and microcephaly with loss of function mutations                                                         | CNV with OMIM Morbid Genes | No microcephaly on prenatal ultrasound. Full term, unknown status                                                  | Yes                  | Yes                                                      |
| 23      | 2015 | NT 3.5mm                                                           | Xp22.31        | Gain     | 1659        | paternal    | Female with gain in in <i>STS</i> , associated with X-linked ichthyosis in males if deleted                                                                                          | CNV with OMIM Morbid Genes | Full term, no postnatal abnormal findings                                                                          | Yes                  | Yes                                                      |
| 24      | 2016 | Fetus with tetralogy of Fallot; prior child with DiGeorge syndrome | Xq25           | Loss x 2 | 1567        | maternal    | Male with loss of <i>ACTRT1</i> , not associated with a disease                                                                                                                      | Large size                 | Termination given uncertainty with VUS                                                                             | No                   | Yes                                                      |
| 25      | 2016 | Prior pregnancy XXX                                                | 4p15.1         | Gain     | 3985        | paternal    | Duplication involving <i>PCDH7</i> ; deletions associated with an increased risk of epilepsy                                                                                         | CNV with OMIM Morbid Genes | Full term birth, large for gestational age, otherwise no abnormal findings                                         | No                   | Yes                                                      |
| 26      | 2016 | Fetus with suspected posterior urethral valves; NT 3.2mm           | 12q24.31q24.32 | Loss     | 1237        | unknown     | Large loss without OMIM Morbid genes                                                                                                                                                 | Large size                 | Developed poor cardiac output with severe biventricular dysfunction, and severe intracranial hemorrhage/infarction | No                   | Yes                                                      |

| Study # | Year | Indication                                                                                            | Location | CNV  | Size (kb)/% | Inheritance | Gene/Disease                                                                                                                                                                                                                                           | Category                   | Outcome                                                                                                                                                                                           | Phenotype well known | Data available regarding likelihood of an affected fetus |
|---------|------|-------------------------------------------------------------------------------------------------------|----------|------|-------------|-------------|--------------------------------------------------------------------------------------------------------------------------------------------------------------------------------------------------------------------------------------------------------|----------------------------|---------------------------------------------------------------------------------------------------------------------------------------------------------------------------------------------------|----------------------|----------------------------------------------------------|
| 27      | 2016 | Twin A- bilateral club feet; Twin B- cystic hygroma, pelviectasis. Growth discordance (Twin B larger) | 6q24.2   | Loss | 37          | maternal    | Both twins with deletion of <i>PEX3</i> , associated with Zellweger syndrome (AR). Biochemical analysis for Zellweger from amniocytes was negative.                                                                                                    | Likely carrier             | Preterm birth; twin A with normal postnatal findings, twin B with Sotos syndrome diagnosed by WES                                                                                                 | Yes                  | Yes                                                      |
| 28      | 2016 | Abnormal analytes                                                                                     | 13q12.12 | Gain | 1393        | paternal    | Gain of 7 genes, associated with disease with loss of function variants                                                                                                                                                                                | CNV with OMIM Morbid Genes | Full term birth; unknown postnatal findings                                                                                                                                                       | No                   | Yes                                                      |
| 29      | 2016 | Abnormal analytes, echogenic bowel                                                                    | 1q41     | Loss | 51          | unknown     | Loss in <i>USH2A</i> , associated with Usher syndrome type IIA (AR)                                                                                                                                                                                    | Likely carrier             | Full term birth, healthy                                                                                                                                                                          | Yes                  | Yes                                                      |
| 30      | 2016 | Abnormal analytes, tetralogy of Fallot and single umbilical artery                                    | 3p26.3   | Loss | 1849        | unknown     | Loss consistent with 3p26 microdeletion syndrome, which has incomplete penetrance, and only 1 case reported with conotruncal anomalies.                                                                                                                | Incomplete penetrance      | Full term birth; confirmed tetralogy of Fallot, vascular ring with right aortic arch, congenital accessory tragus; decreased attention, conductive hearing loss, probable submucosal cleft palate | Yes                  | Yes                                                      |
| 31      | 2016 | Abnormal analytes; myelomeningocele                                                                   | 22q11.23 | Gain | 1314        | unknown     | LCR F-H distal duplication (not overlapping with 22q11.2 microdeletion syndrome), associated with developmental delay, ADHD, abnormal facial features, seizure, and renal anomalies, but of incomplete penetrance. No findings of neural tube defects. | Incomplete penetrance      | Termination                                                                                                                                                                                       | Yes                  | Yes                                                      |
| 32      | 2016 | AMA; prior male fetus with deletion in Xp22.31                                                        | Xp22.31  | Loss | 1683        | maternal    | Female with loss of <i>STS</i> gene, associated with X-linked ichthyosis. Female carriers can have minor skin manifestations or corneal opacities.                                                                                                     | Likely carrier             | Full term birth, healthy                                                                                                                                                                          | Yes                  | Yes                                                      |
| 33      | 2016 | AMA                                                                                                   | 4q34.3   | Gain | 1761        | paternal    | Gain without OMIM Morbid genes.                                                                                                                                                                                                                        | Large size                 | Full term birth, healthy                                                                                                                                                                          | No                   | Yes                                                      |

| Study # | Year | Indication                                                            | Location      | CNV  | Size (kb)/% | Inheritance | Gene/Disease                                                                                                                                                                                                                                                                                                                                                                                                                                                                                | Category                   | Outcome                                                                                                          | Phenotype well known | Data available regarding likelihood of an affected fetus |
|---------|------|-----------------------------------------------------------------------|---------------|------|-------------|-------------|---------------------------------------------------------------------------------------------------------------------------------------------------------------------------------------------------------------------------------------------------------------------------------------------------------------------------------------------------------------------------------------------------------------------------------------------------------------------------------------------|----------------------------|------------------------------------------------------------------------------------------------------------------|----------------------|----------------------------------------------------------|
| 34      | 2016 | AMA; abnormal analytes                                                | 22q13.2q13.33 | Loss | 7808        | unknown     | Twin A with loss of 59 OMIM genes, including <i>SHANK3</i> , associated with Phelan-McDermid syndrome. Loss appears in ~10-20% of cells, consistent with low level mosaicism.                                                                                                                                                                                                                                                                                                               | Mosaicism                  | Karyotype confirmed mosaic ring chromosome 22. Termination (resulting in reduction from DCDA twins to singleton) | Yes                  | Yes                                                      |
| 35      | 2016 | AMA; abnormal analytes                                                | 16p13.3       | Loss | 21          | unknown     | Loss of <i>HBA1</i> and <i>HBA2</i> genes, associated with likely alpha thalassemia trait. Father known alpha thalassemia trait, mother with normal MCV.                                                                                                                                                                                                                                                                                                                                    | Likely carrier             | Full term birth, no abnormal findings                                                                            | Yes                  | Yes                                                      |
| 36      | 2017 | NT 3.1mm                                                              | 8q23.1        | Loss | 113         | unknown     | Female with loss of 2 exons of <i>ZFPM2</i> , associated with autosomal dominant 46,XY sex reversal, CDH, and cardiac anomalies, associated with incomplete penetrance                                                                                                                                                                                                                                                                                                                      | Incomplete penetrance      | Unknown                                                                                                          | Yes                  | Yes                                                      |
| 37      | 2017 | Stage 3 TTTS                                                          | 2q36.3        | Loss | 57          | unknown     | Loss of <i>SLC19A3</i> , associated with thiamine metabolism dysfunction syndrome 2 (AR)                                                                                                                                                                                                                                                                                                                                                                                                    | Likely carrier             | Preterm labor (PPROM, cord prolapse day after amnioreduction); unknown postnatal findings                        | Yes                  | Yes                                                      |
| 38      | 2017 | Abnormal analytes                                                     | 1p36.22       | Loss | 1368        | de novo     | Loss of 6 OMIM genes, in a region found in some cases of 1p36 deletion syndrome, though typically larger deletions are implicated. Suggested critical region not included in this loss BP1 to BP2 deletion, with 4 OMIM Morbid genes (not including those associated with Prader Willi or Angelman syndromes) associated with developmental delay, intellectual disability and behavioral disturbances (including autism), but incomplete penetrance (about 10%). No evidence of Trisomy X. | CNV with OMIM Morbid Genes | Termination                                                                                                      | Yes                  | Yes                                                      |
| 39      | 2017 | NIPT XXX; another child with autism (no genetic evaluation)           | 15q11.2       | Loss | 476         | unknown     | BP1 to between BP2 and BP3 deletion, not specifically associated with a well-described deletion syndrome. Includes 6 OMIM Morbid genes (not including those associated with Prader Willi or Angelman syndromes), including <i>MAGEL2</i> (variably can have a Prader-Willi or autism phenotype).                                                                                                                                                                                            | Incomplete penetrance      | Unknown                                                                                                          | Yes                  | Yes                                                      |
| 40      | 2017 | AMA; 2 second degree relatives with intellectual or behavioral issues | 15q11.2       | Loss | 1276        | maternal    | BP1 to between BP2 and BP3 deletion, not specifically associated with a well-described deletion syndrome. Includes 6 OMIM Morbid genes (not including those associated with Prader Willi or Angelman syndromes), including <i>MAGEL2</i> (variably can have a Prader-Willi or autism phenotype).                                                                                                                                                                                            | CNV with OMIM Morbid Genes | Full term birth, no abnormal findings                                                                            | Yes                  | Yes                                                      |



| Study # | Year | Indication                                         | Location | CNV  | Size (kb)/% | Inheritance | Gene/Disease                                                                                                           | Category                   | Outcome                                                                                     | Phenotype well known | Data available regarding likelihood of an affected fetus |
|---------|------|----------------------------------------------------|----------|------|-------------|-------------|------------------------------------------------------------------------------------------------------------------------|----------------------------|---------------------------------------------------------------------------------------------|----------------------|----------------------------------------------------------|
| 50      | 2015 | AMA; family history of myotonic dystrophy          | 13q31.3  | Loss | 149         | unknown     | Intronic deletion of <i>GPC6</i> , associated with omodysplasia-1 with loss of function variants                       | CNV with OMIM Morbid Genes | Full term birth; no anomalies                                                               | Yes                  | Yes                                                      |
| 51      | 2015 | AMA                                                | 15q14q23 | ROH  | 29677       | [ROH]       | Large ROH suggestive of maternal UPD on chromosome 15, which had imprinted genes associated with Prader Willi syndrome | Large ROH                  | Methylation studies confirmed Prader Willi syndrome. Pregnancy terminated.                  | Yes                  | Yes                                                      |
| 52      | 2015 | AMA, mother with intermediate allele for Fragile X | 13q12.11 | Loss | 306         | unknown     | Loss of <i>GJB6</i> , associated with nonsyndromic hearing loss (AR)                                                   | Likely carrier             | Sequencing of <i>GJB6</i> was normal, confirming carrier status.                            | Yes                  | Yes                                                      |
| 53      | 2016 | AMA; nephew with Cutis Marmorata Congenita         | 16p13    | Loss | 17          | paternal    | Loss of <i>HBA1</i> and <i>HBA2</i> genes, associated with alpha thalassemia                                           | Likely carrier             | Sequencing panel for alpha globin mutations was normal, confirming alpha thalassemia trait. | Yes                  | Yes                                                      |
| 54      | 2017 | Fetal congenital diaphragmatic hernia              | 6q24.2   | Loss | 37          | unknown     | Loss of <i>PEX3</i> , associated with an autosomal recessive form of Zellweger syndrome                                | Likely carrier             | Sequencing of <i>PEX3</i> was normal, confirming carrier status                             | Yes                  | Yes                                                      |
| 55      | 2018 | AMA, abnormal analytes                             | 1q23.1   | Loss | 436         | unknown     | Loss of <i>SPTA1</i> , associated with hereditary elliptocytosis (AR)                                                  | Likely carrier             | Sequencing of <i>SPTA1</i> and <i>PCD15</i> genes confirmed carrier status.                 | Yes                  | Yes                                                      |
|         |      |                                                    | 10q21.1  | Loss | 434         | unknown     | Loss of <i>PCD15</i> , associated with autosomal recessive deafness and Usher syndrome type 1.                         | Likely carrier             |                                                                                             |                      |                                                          |

Abbreviations: ADHD = attention deficit hyperactivity disorder, ALL = acute lymphoid leukemia, AMA = advanced maternal age, AR = autosomal recessive, CDH = congenital diaphragmatic hernia, CNV = copy number variant, CVS = chorionic villous sample, DCDA = dichorionic diamniotic, IUGR = in utero growth restriction, MCV = mean corpuscular volume, NIPT = noninvasive prenatal testing, NND = neonatal demise, NT = nuchal translucency, PPROM = preterm premature rupture of membranes, ROH = regions of homozygosity, RPL = recurrent pregnancy loss, SGA = small for gestational age, TTTS = twin twin transfusion syndrome, UPD = uniparental disomy, VSD = ventricular septal defect, VUS = variant of uncertain significance, WES = whole exome sequencing
